# Supplementary material for: Multi-component (Ag–Au–Cu–Pd–Pt) alloy nanoparticle-decorated p-type 2D-molybdenum disulfide (MoS2) for enhanced hydrogen sensing
Source: Royal Society of Chemistry journal article supplement (doi:10.1039/d0nr02177f), 2020-01-01
Supplement: d0nr02177f1.pdf [file d0nr02177f1.pdf]

## High Entropy Alloy Nanoparticles Decorated, p-type 2D-Molybdenum Disulphide (MoS<sub>2</sub>) and Gold Schottky Junction Enhanced Hydrogen Sensing

Kusuma Urs MB<sup>1#</sup>, Nirmal Kumar Katiyar<sup>2#</sup>, Ritesh Kumar<sup>3</sup>, Krishanu Biswas<sup>2\*</sup>, Abhishek K. Singh<sup>3\*</sup>, C S Tiwary<sup>4\*</sup> and Vinayak Kamble<sup>1\*</sup>

<sup>1</sup> School of Physics, Indian Institute of Science Education and Research, Thiruvananthapuram, Kerala -695551 INDIA

<sup>2</sup> Department of Materials Science and Engineering, Indian Institute of Technology Kanpur, Kanpur-208016 INDIA

<sup>3</sup> Materials Research Centre, Indian Institute of Science, Bangalore, Karnataka-560012, INDIA

<sup>4</sup> Metallurgical and Materials Engineering, Indian Institute of Technology Kharagpur, Kharagpur-382355, INDIA

### Supplementary

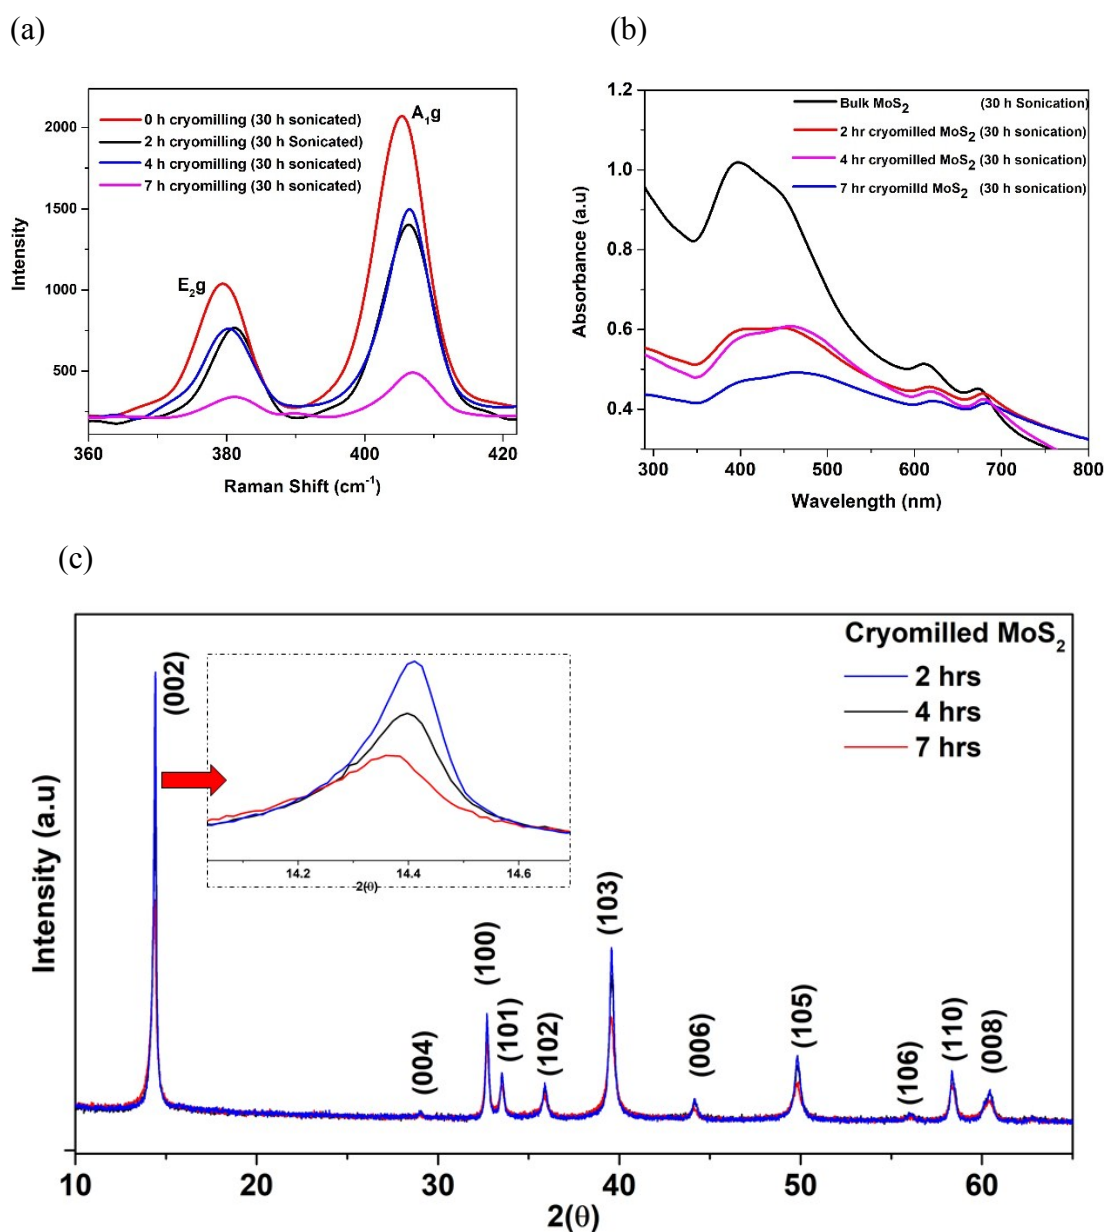

**Figure S1:** (a) Raman spectrum of successive hours cryomilled and sonicated for 30 hours (b) absorption spectra of MoS<sub>2</sub> in successive hours cryomilling (c) X-ray diffraction pattern of successive hours cryomilling of MoS<sub>2</sub>.

### Hall Effect:

Hall effect measurement was done at two different values of Magnetic field i.e. 2000 G and 4000 G to confirm the carrier type and it confirms the majority carriers as **p-type**.

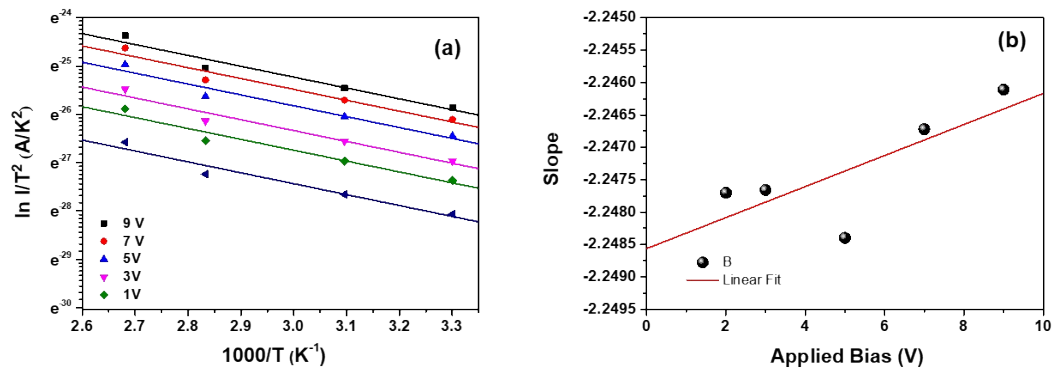

Figure

re S2 (a) The variation of  $I/T^2$  Vs  $1/T$  at various applied biases and of slope at each bias voltage.

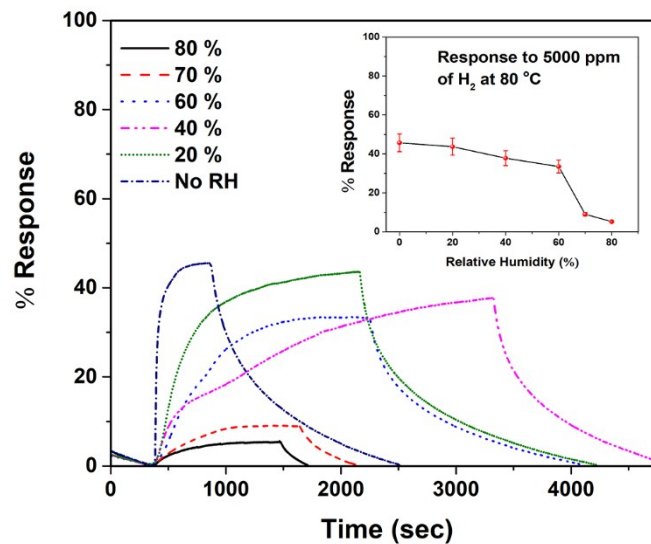

Figure S3. The response of the  $MoS_2+HEA$  sample for 5000 ppm of  $H_2$  at  $80^\circ C$  for various relative humidity levels.

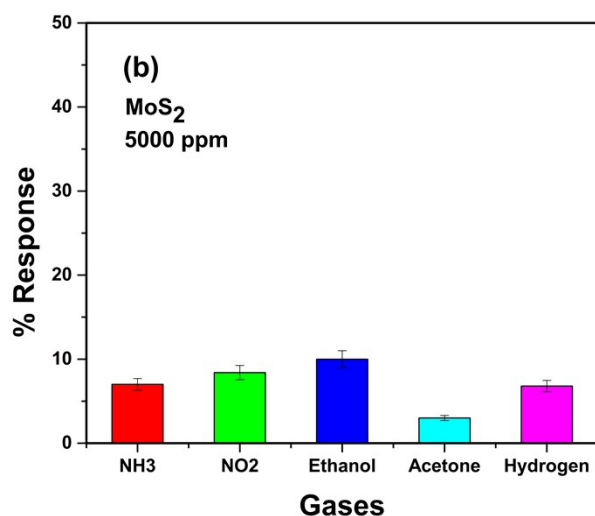

**Figure S4:** The response of bare MoS<sub>2</sub> sensor towards 5000 ppm of gases at 80°C depicting the cross sensitivity to other gases.

**Table S1.** The quantification (absolute and relative) of X-ray Photoelectron spectroscopy data.

|                            | MoS <sub>2</sub> |          |      |          | MoS <sub>2</sub> +HEA |          |      |          |
|----------------------------|------------------|----------|------|----------|-----------------------|----------|------|----------|
|                            | BE(eV)           | Area     | FWHM | Relative | BE(eV)                | Area     | FWHM | Relative |
|                            | (eV)             |          | M    | %        | (eV)                  |          | M    | %        |
| S (2S)                     | 226.5            | 10083.59 | 1.95 |          | 226.9                 | 717.26   | 2.15 |          |
| Mo (+4) 3d 5/2             | 229.3            | 41149.91 | 1.44 |          | 229.3                 | 1724.38  | 1.58 |          |
| Mo (+4) 3p 3/2             | 232.9            | 17089.00 | 1.43 | 67.2     | 232.3                 | 3823.86  | 1.66 | 57.5     |
| Mo (+6) 3d 5/2             | 232.3            | 22128.79 | 1.41 |          | 232.9                 | 1245.09  | 2.10 |          |
| Mo (+6) 3p 3/2             | 235.9            | 6271.14  | 1.47 | 32.8     | 235.8                 | 2857.87  | 2.19 | 42.5     |
| S(-2) 2p 3/2               | 162.3            | 15360.79 | 1.13 |          | 162.3                 | 977.62   | 1.34 |          |
| S(-2) 2p 1/2               | 162.8            | 7868.44  | 1.14 |          | 163.3                 | 450.50   | 1.30 |          |
| S <sub>2</sub> (-2) 2p 3/2 | 163.6            | 4148.82  | 0.79 |          | 164.1                 | 77.73    | 0.63 |          |
| S <sub>2</sub> (-2) 2p 1/2 | 165.0            | 14479.30 | 1.88 |          | 165.7                 | 235.30   | 4.64 |          |
| SO <sub>x</sub>            | 169.1            | 248.97   | 1.02 |          | 168.6                 | 1658.37  | 1.63 |          |
|                            |                  |          |      |          | 169.8                 | 853.15   | 1.71 |          |
|                            |                  |          |      |          |                       |          |      |          |
| O 2s                       | 529.6            | 52278.54 | 1.78 | 55.7     | 529.5                 | 80744.27 | 1.70 | 56.5     |
| O(defect) 2s               | 531.2            | 41627.29 | 2.57 | 44.3     | 530.8                 | 62178.21 | 2.40 | 43.5     |

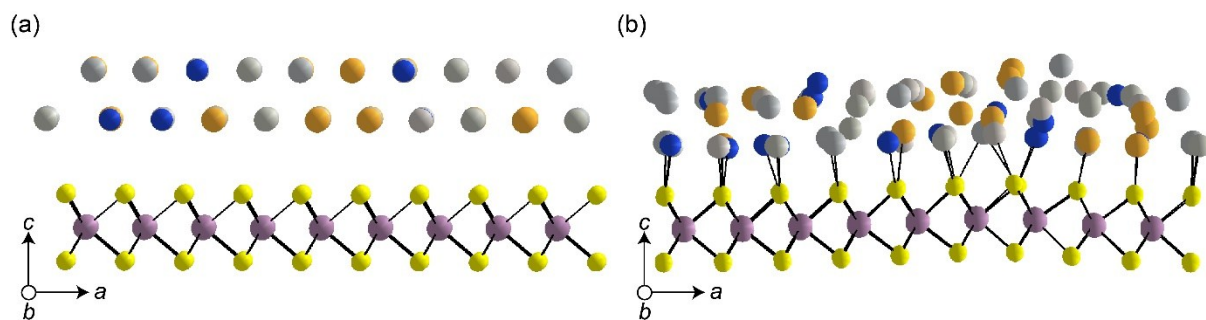

**Figure S5.** Structures of (a) initial, and (b) completely relaxed MoS<sub>2</sub>-HEA system. Light violet, yellow, light grey, dark grey, gold, silver, and blue spheres represent Mo, S, Pt, Pd, Au, Ag, and Cu atoms, respectively.

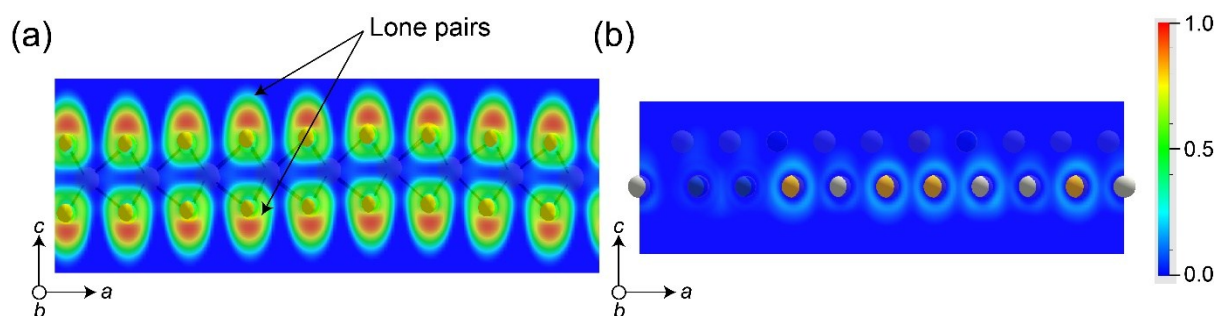

**Figure S6.** ELF of isolated (a) MoS<sub>2</sub>, and (b) HEA systems along (010) plane. The color bar for ELF values are also shown alongside. Violet, yellow, light grey, dark grey, gold, silver, and blue spheres represent Mo, S, Pt, Pd, Au, Ag, and Cu atoms, respectively.

**Table S2.** DFT energies of completely relaxed structures used in the present study.

| System                               | $E_{\text{DFT}}$ (eV) |
|--------------------------------------|-----------------------|
| MoS <sub>2</sub> (9x4x1 supercell)   | - 779.99              |
| PtPdAgAuCu HEA                       | - 290.56              |
| MoS <sub>2</sub> + HEA               | - 1082.28             |
| H adsorbed on MoS <sub>2</sub>       | - 781.57              |
| H adsorbed on MoS <sub>2</sub> + HEA | - 1086.00             |
| H <sub>2</sub>                       | - 6.77                |
